# Supplementary material for: A Review of the Theoretical Basis, Effects, and Cost Effectiveness of Online Smoking Cessation Interventions in the Netherlands: A Mixed-Methods Approach
Source: PubMed Central journal article supplement (PMC5501927; doi:10.2196/jmir.7209), 2017-06-23
Supplement: jmir_v19i6e230_app1.pdf [file jmir_v19i6e230_app1.pdf]

Multimedia Appendix 1. Theoretical factors of grey literature

| Intervention                                                                                               | Static      | Effectivity | Attitude | Social influence | Self-efficacy | Action & Coping planning |
|------------------------------------------------------------------------------------------------------------|-------------|-------------|----------|------------------|---------------|--------------------------|
| De StopSite (The QuitSite) <sup>a</sup>                                                                    | Interactive | NR          | Yes      | Yes              | Yes           | Yes                      |
| uQuit.nl <sup>a</sup>                                                                                      | Interactive | NR          | Yes      | Yes              | Yes           | Yes                      |
| Tabakstop (Tobaccostop)                                                                                    | Interactive | NR          | Yes      | Yes              | Yes           | Yes                      |
| ExSmokers (iCoach)                                                                                         | Interactive | NR          | Yes      | No               | Yes           | Yes                      |
| Stoppen met roken (Smoking cessation)                                                                      | Interactive | NR          | Yes      | Yes              | No            | Yes                      |
| Roken de Baas (Boss of your smoking) <sup>a</sup>                                                          | Interactive | NR          | Yes      | Yes              | No            | Yes                      |
| CZ Stoppen met roken coach (CZ smoking cessation coach) <sup>a</sup>                                       | Interactive | NR          | Yes      | NR               | NR            | NR                       |
| Stoppen met roken (Smoking cessation) <sup>a</sup>                                                         | Interactive | NR          | NR       | NR               | NR            | NR                       |
| StopExpert <sup>a</sup>                                                                                    | Interactive | NR          | NR       | NR               | NR            | NR                       |
| Online zelfhulp tabak (Online selfhelp tobacco) <sup>a</sup>                                               | Interactive | NR          | NR       | NR               | NR            | NR                       |
| Stoppen met roken, in één dag van het roken af (Smoking cessation, quit in one day) <sup>a</sup>           | Interactive | NR          | NR       | NR               | NR            | NR                       |
| Wat doe je om te stoppen met roken? De PZP helpt (What to do to quit smoking? PZP helps)                   | Interactive | NR          | NR       | NR               | NR            | NR                       |
| Home Roken - Ja (Home Smoking - Yes)                                                                       | Interactive | NR          | NR       | NR               | NR            | NR                       |
| Training stoppen met roken - Kentra (Training smoking cessation - Kentra)                                  | Interactive | NR          | NR       | NR               | NR            | NR                       |
| stoppen met roken (smoking cessation)   ilifecoach                                                         | Interactive | NR          | NR       | NR               | NR            | NR                       |
| Online cursus stoppen met roken   Zo stop je wel (Online course smoking cessation   You'll quit like this) | Interactive | NR          | NR       | NR               | NR            | NR                       |
| Stoppen met roken (Smoking cessation)                                                                      | Static      | NR          | Yes      | Yes              | Yes           | Yes                      |
| ikstopnu.nl (Iquitnow.nl) <sup>a</sup>                                                                     | Static      | NR          | Yes      | Yes              | Yes           | Yes                      |
| Ik stop! (I quit!)                                                                                         | Static      | NR          | Yes      | Yes              | Yes           | Yes                      |
| NuStoppenmetRoken.nl - Stoppen met Roken (Quitsmokingnow.nl - Smoking cessation)                           | Static      | NR          | Yes      | Yes              | Yes           | Yes                      |
| Stoppen met roken (Smoking cessation)                                                                      | Static      | NR          | Yes      | No               | Yes           | Yes                      |
| Stoppen met roken -(Smoking cessation)                                                                     | Static      | NR          | Yes      | Yes              | No            | Yes                      |
| Hoe kan ik stoppen met roken? (How can I quit smoking?)                                                    | Static      | NR          | Yes      | Yes              | Yes           | Yes                      |
| Rokeninfo.nl (Smokinginfo.nl) <sup>a</sup>                                                                 | Static      | NR          | Yes      | Yes              | No            | Yes                      |
| Ex rokers (Former smokers)                                                                                 | Static      | NR          | Yes      | Yes              | Yes           | Yes                      |
| Tips stoppen met roken (Tips to quit smoking)                                                              | Static      | NR          | Yes      | Yes              | No            | Yes                      |
| Hoe kan ik stoppen met roken? (How to quit smoking?)                                                       | Static      | NR          | Yes      | Yes              | No            | Yes                      |

|                                                                                            |        |    |           |           |           |           |
|--------------------------------------------------------------------------------------------|--------|----|-----------|-----------|-----------|-----------|
| Ik Wil Stoppen Met Roken.NU (I Want To Quit Smoking.NU (NOW)) <sup>a</sup>                 | Static | NR | Yes       | No        | No        | Yes       |
| Welkom bij de stoppen met roken test! (Welcome to the smoking cessation test) <sup>a</sup> | Static | NR | Yes       | No        | Yes       | Yes       |
| soChicken                                                                                  | Static | NR | Yes       | No        | No        | Yes       |
| Waarom stoppen met roken? (Why quit smoking?) — Watchtower ONLINE LIBRARY                  | Static | NR | Yes       | Yes       | No        | No        |
| Stoppen met Roken (Smoking cessation)                                                      | Static | NR | Yes       | No        | No        | No        |
| Stoppen met Roken ? (Quit smoking?)                                                        | Static | NR | Yes       | No        | No        | No        |
| Stoptober <sup>a</sup>                                                                     | Static | NR | NR        | Yes       | NR        | NR        |
| Stoppen met Roken.nl (Smoking Cessation.nl)                                                | Static | NR | No        | No        | No        | No        |
| Stoppen met roken - GGD Fryslan (Smoking cessation – CHS of Fryslan)                       | Static | NR | Yes       | No        | No        | No        |
| Welkom bij nl.support.stop-met-roken (Welcome to nl.support smoking cessation)             | Static | NR | No        | No        | No        | No        |
| Stoppen met roken (Smoking cessation) – YouTube                                            | Static | NR | Yes       | No        | No        | No        |
| Eenrookvrijleven.nl (Smokefreelife.nl) <sup>a</sup>                                        | Static | NR | NR        | NR        | NR        | NR        |
| <b>Percentage<sup>a</sup></b>                                                              |        |    | <b>67</b> | <b>44</b> | <b>31</b> | <b>51</b> |

a = Percentage (%) interventions of grey literature including this theoretical factor
