# Supplementary material for: A Review of the Theoretical Basis, Effects, and Cost Effectiveness of Online Smoking Cessation Interventions in the Netherlands: A Mixed-Methods Approach
Source: PubMed Central journal article supplement (PMC5501927; doi:10.2196/jmir.7209), 2017-06-23
Supplement: jmir_v19i6e230_app2.pdf [file jmir_v19i6e230_app2.pdf]

## Multimedia Appendix 2. BCTs of grey literature

| Intervention                                                                                               | Static      | Effectivity | BCT1 <sup>b</sup> | BCT2 <sup>b</sup> | BCT3 <sup>b</sup> | BCT4 <sup>b</sup> | BCT5 <sup>b</sup> |
|------------------------------------------------------------------------------------------------------------|-------------|-------------|-------------------|-------------------|-------------------|-------------------|-------------------|
| De StopSite (The QuitSite) <sup>a</sup>                                                                    | Interactive | NR          | Yes               | Yes               | Yes               | Yes               | Yes               |
| uQuit.nl <sup>a</sup>                                                                                      | Interactive | NR          | Yes               | Yes               | Yes               | Yes               | Yes               |
| Tabakstop (Tobaccostop)                                                                                    | Interactive | NR          | Yes               | Yes               | Yes               | Yes               | Yes               |
| ExSmokers (iCoach)                                                                                         | Interactive | NR          | Yes               | Yes               | Yes               | Yes               | Yes               |
| Stoppen met roken (Smoking cessation)                                                                      | Interactive | NR          | Yes               | Yes               | Yes               | Yes               | Yes               |
| Roken de Baas (Boss of your smoking) <sup>a</sup>                                                          | Interactive | NR          | No                | No                | Yes               | No                | Yes               |
| CZ Stoppen met roken coach (CZ smoking cessation coach) <sup>a</sup>                                       | Interactive | NR          | NR                | Yes               | Yes               | Yes               | NR                |
| Stoppen met roken (Smoking cessation) <sup>a</sup>                                                         | Interactive |             | NR                | NR                | NR                | NR                | NR                |
| StopExpert <sup>a</sup>                                                                                    | Interactive | NR          | NR                | NR                | NR                | NR                | NR                |
| Online zelfhulp tabak (Online selfhelp tobacco) <sup>a</sup>                                               | Interactive | NR          | NR                | NR                | NR                | NR                | NR                |
| Stoppen met roken, in één dag van het roken af (Smoking cessation, quit in one day) <sup>a</sup>           | Interactive | NR          | NR                | NR                | NR                | NR                | NR                |
| Wat doe je om te stoppen met roken? De PZP helpt (What to do to quit smoking? PZP helps)                   | Interactive | NR          | NR                | NR                | NR                | NR                | NR                |
| Home Roken – Ja (Home Smoking – Yes)                                                                       | Interactive | NR          | NR                | NR                | NR                | NR                | NR                |
| Training stoppen met roken – Kentra (Training smoking cessation – Kentra)                                  | Interactive | NR          | NR                | NR                | NR                | NR                | NR                |
| stoppen met roken (smoking cessation)   iLifecoach                                                         | Interactive | NR          | NR                | NR                | NR                | NR                | NR                |
| Online cursus stoppen met roken   Zo stop je wel (Online course smoking cessation   You'll quit like this) | Interactive | NR          | NR                | NR                | NR                | NR                | NR                |
| Stoppen met roken (Smoking cessation)                                                                      | Static      | NR          | Yes               | Yes               | Yes               | Yes               | Yes               |
| ikstopnu.nl (Iquitnow.nl) <sup>a</sup>                                                                     | Static      | NR          | Yes               | Yes               | Yes               | Yes               | Yes               |
| Ik stop! (I quit!)                                                                                         | Static      | NR          | No                | No                | Yes               | Yes               | Yes               |
| NuStoppenmetRoken.nl - Stoppen met Roken (Quitsmokingnow.nl - Smoking cessation)                           | Static      | NR          | No                | No                | Yes               | Yes               | Yes               |
| Stoppen met roken (Smoking cessation)                                                                      | Static      | NR          | No                | Yes               | Yes               | Yes               | Yes               |
| Stoppen met roken –(Smoking cessation)                                                                     | Static      | NR          | No                | Yes               | Yes               | Yes               | Yes               |
| Hoe kan ik stoppen met roken? (How can I quit smoking?)                                                    | Static      | NR          | No                | Yes               | Yes               | Yes               | No                |
| Rokeninfo.nl (Smokinginfo.nl) <sup>a</sup>                                                                 | Static      | NR          | Yes               | Yes               | Yes               | No                | Yes               |
| Ex rokers (Former smokers)                                                                                 | Static      | NR          | Yes               | No                | Yes               | Yes               | No                |
| Tips stoppen met roken (Tips to quit smoking)                                                              | Static      | NR          | No                | Yes               | Yes               | Yes               | Yes               |
| Hoe kan ik stoppen met roken? (How to quit smoking?)                                                       | Static      | NR          | Yes               | Yes               | No                | Yes               | No                |
| Ik Wil Stoppen Met Roken.NU (I Want To Quit Smoking.NU (NOW)) <sup>a</sup>                                 | Static      | NR          | No                | No                | Yes               | Yes               | Yes               |
| Welkom bij de stoppen met roken test! (Welcome to the smoking cessation test) <sup>a</sup>                 | Static      | NR          | No                | Yes               | No                | No                | No                |
| soChicken                                                                                                  | Static      | NR          | No                | No                | Yes               | No                | Yes               |
| Waarom stoppen met roken? (Why quit smoking?) — Watchtower ONLINE LIBRARY                                  | Static      | NR          | Yes               | No                | No                | No                | No                |
| Stoppen met Roken (Smoking cessation)                                                                      | Static      | NR          | No                | No                | No                | No                | Yes               |
| Stoppen met Roken ? (Quit smoking?)                                                                        | Static      | NR          | No                | No                | No                | No                | Yes               |
| Stoptober <sup>a</sup>                                                                                     | Static      | NR          | NR                | NR                | NR                | NR                | Yes               |
| Stoppen met Roken.nl (Smoking Cessation.nl)                                                                | Static      | NR          | No                | No                | No                | No                | Yes               |

|                                                                                      |        |    |    |    |    |    |     |
|--------------------------------------------------------------------------------------|--------|----|----|----|----|----|-----|
| Stoppen met roken - GGD Fryslan<br>(Smoking cessation – CHS of Fryslan)              | Static | NR | No | No | No | No | No  |
| Welkom bij nl.support.stop-met-roken<br>(Welcome to nl.support smoking<br>cessation) | Static | NR | No | No | No | No | Yes |
| Stoppen met roken (Smoking cessation) -<br>YouTube                                   | Static | NR | No | No | No | No | No  |
| Eenrookvrijleven.nl (Smokefreelife.nl) <sup>a</sup>                                  | Static | NR | NR | NR | NR | NR | NR  |
| <b>Percentage<sup>a</sup></b>                                                        |        |    | 28 | 39 | 49 | 44 | 54  |

a = Percentage (%) interventions of scientific literature including this BCT

b = BCT1=Supporting Identity change; BCT2=Rewarding abstinence; BCT3=Advising on changing routines; BCT4=Advising on coping; and BCT5=Advising on medication use
